# Supplementary material for: Terlipressin for septic shock patients: a meta-analysis of randomized controlled study
Source: PubMed Central journal article supplement (PMC6419496; doi:10.1186/s40560-019-0369-1), 2019-03-12
Supplement: 40560_2019_369_MOESM4_ESM.pdf [file 40560_2019_369_MOESM4_ESM.pdf]

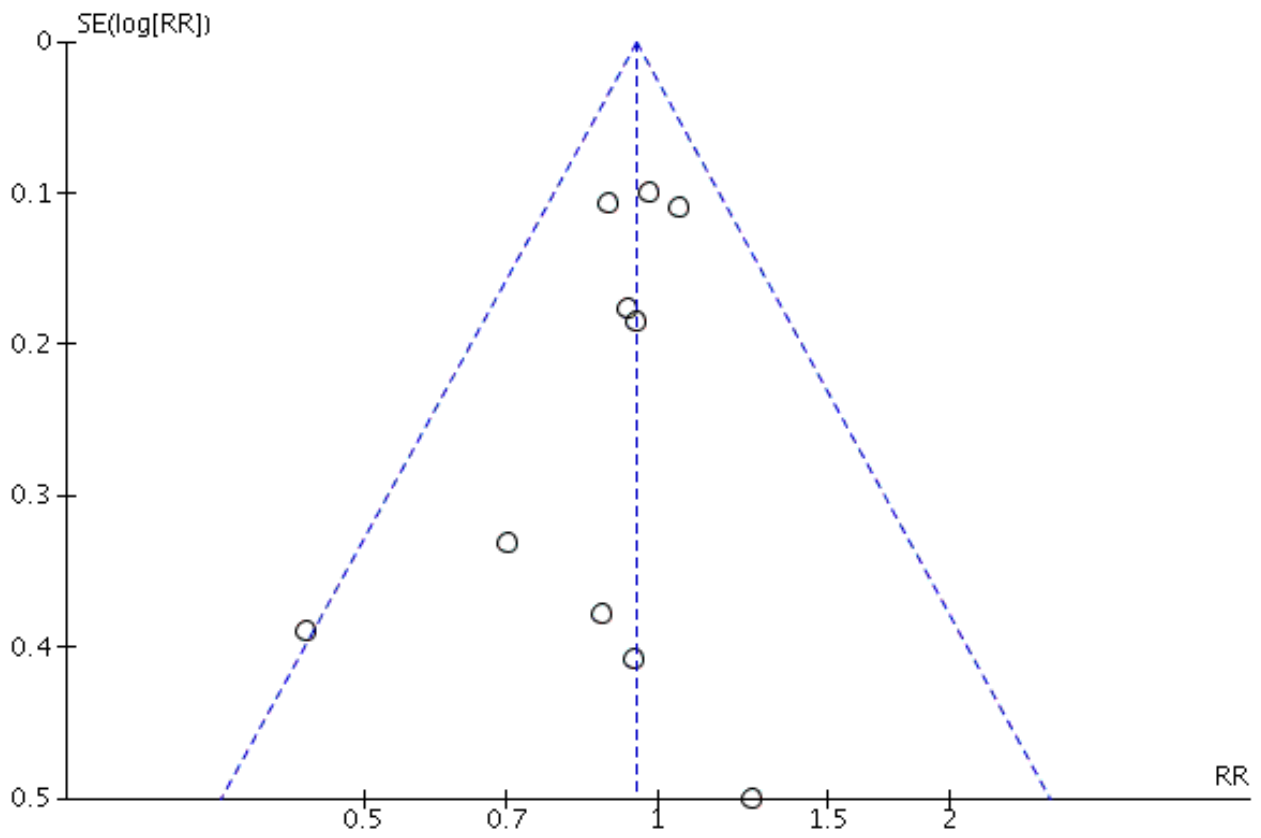

**Fig. S2** Funnel plots. Funnel plots were generally asymmetrical. The hollow dots and dotted line indicate individual studies and 95% confidence intervals, respectively.
