# Supplementary material for: Terlipressin for septic shock patients: a meta-analysis of randomized controlled study
Source: J Intensive Care. 2019 Mar 12;7:16. doi: 10.1186/s40560-019-0369-1 (PMC6419496; doi:10.1186/s40560-019-0369-1)
Supplement: Supplementary file 3 — Figure S1. Risk of bias. (PDF 3192 kb) [file 40560_2019_369_MOESM3_ESM.pdf]

|                                                           |   |   |   |   |   |   |
|-----------------------------------------------------------|---|---|---|---|---|---|
| Albanese 2005                                             | + | + | + | + | + | + |
| Chen 2017                                                 | + | + | + | + | + | + |
| Choudhury 2016                                            | + | + | + | + | + | + |
| Hua 2013                                                  | + | + | + | + | + | + |
| Liu 2018                                                  | + | + | + | + | + | + |
| Morelli 2008                                              | + | + | + | + | + | + |
| Morelli 2009                                              | + | + | + | + | + | + |
| Svoboda 2012                                              | + | + | + | + | + | + |
| Xiao 2015                                                 | + | + | + | + | + | + |
| Yildizdas 2008                                            | + | + | + | + | + | + |
| Random sequence generation (selection bias)               | + | + | + | + | + | + |
| Allocation concealment (selection bias)                   | ? | + | + | + | + | + |
| Blinding of participants and personnel (performance bias) | - | + | + | + | + | + |
| Incomplete outcome data (attrition bias)                  | + | + | + | + | + | + |
| Selective reporting (reporting bias)                      | + | + | + | + | + | + |
| Other bias                                                | + | + | + | + | + | + |

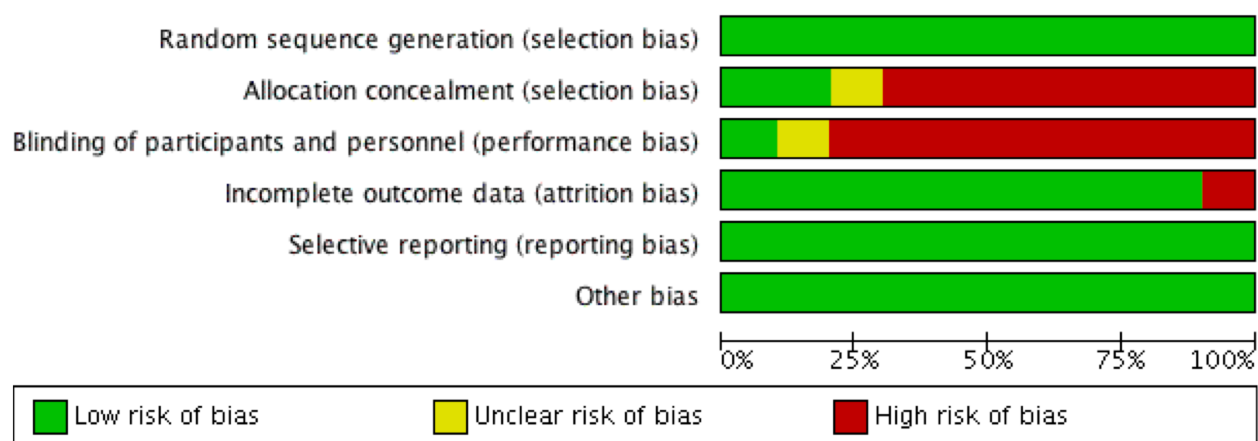

**Fig. S1** Risk of bias.
